# Supplementary material for: Necessity of electrically conductive pili for methanogenesis with magnetite stimulation
Source: PeerJ. 2018 Mar 21;6:e4541. doi: 10.7717/peerj.4541 (PMC5866715; doi:10.7717/peerj.4541)
Supplement: Data S1 [file peerj-06-4541-s001.xlsx]

## Sheet: Methane
Co-cultures of G. metallireducens (G. m) and M. barkeri (M. b) with ethanol as the substrate in the presence, or absence, of magnetite (Fe3O4).
Methane(mmol)	G.m+Fe3O4 (5mmol L-1)		G.m+M.b+Fe3O4(2.5mmol L-1)+Fe3O4 (2.5mmol L-1, after 10 days)		G.m+M.b+Fe3O4 (5mmol L-1)		Fe3O4 (5mmol L-1) without cells		M.b+Fe3O4 (5mmol L-1)		G.m+M.b
Days	mean	SD	+Fe3O4 (2.5mmol L-1, after 10 days)		mean	SD	mean	SD	mean	SD	mean	SD
0	0	0	0	0	0	0	0	0	0	0	0	0
5	0.0104	0.0026799	0.0241	0.0029791	0.0275	0.00048106	0	0	0.0255	0.00054123	0.0186	7.7749e-05
10	0.0211	5.9033e-06	0.0129	0.0016574	0.0197	9.3491e-05	0	0	0.0537	0.00017369	0.0528	0.0011491
15	0.0027412	0.00011331	0.149	0.01	0.141	0.0021995	0	0	0.049	0.00021558	0.0457	0.00037515
20	0.0097527	0.00022459	0.374	0.0332	0.3768	0.0102	0	0	0.0502	0.0029996	0.3286	0.0065185
25	0.003615	9.6279e-05	0.727	0.0568	0.6936	0.0042706	0	0	0.05	0.0031054	0.3473	0.0033504
30	0.0017877	0.00027673	1.152	0.0241	1.2157	0.0252	0	0	0.0595	0.0053475	0.4119	0.0023931
35	0.0015176	2.8306e-05	1.346	0.1435	1.3435	0.0041205	0	0	0.0648	0.0091612	0.4294	0.0047055
40	0.001048	2.0115e-05	1.581	0.0376	1.5592	0.0304	0	0	0.069	0.0034044	0.4205	0.0050358
45	0.0257	0.0027622	1.558	0.0011528	1.6065	0.0069548	0	0	0.0698	0.005295	0.4523	0.00015048
50	0.0029602	0.00016544	1.59	9.03e-05	1.6095	0.0032153	0	0	0.0627	0.0052023	0.4599	0.0045039

## Sheet:  Ferrous iron
Ferrous iron(mmol)	G.m+Fe3O4 (5mmol L-1)		G.m+M.b+Fe3O4(2.5mmol L-1)+Fe3O4 (2.5mmol L-1, after 10 days)		G.m+M.b+Fe3O4 (5mmol L-1)		Fe3O4 (5mmol L-1) without cells		M.b+Fe3O4 (5mmol L-1)		G.m+M.b
Days	mean	SD			mean	SD			mean	SD	mean	SD
0	0.2035	0.0108	0.1092	0.0256	0.2321	0.0697	0.1611	0.0624	0.2071	0.0309	0.0118	0.001104
5	0.3444	0.0741	0.1331	0.001104	0.2368	0.0418	0.1661	0.019	0.1627	0.0461	0.0171	0.0002205
10	0.3478	0.0472	0.1285	0.0251	0.2843	0.0638	0.175	0.0309	0.1858	0.0139	0.0189	0.005952
15	0.3575	0.0185	0.2363	0.0586	0.264	0.0417	0.1875	0.004412	0.1413	0.0287	0.0234	0.007496
20	0.3129	0.0472	0.2823	0.0769	0.3556	0.0221	0.1585	0.005292	0.1256	0.017	0.0233	0.0086
25	0.3477	0.0461	0.3759	0.0278	0.3436	0.0629	0.093	0.0295	0.1137	0.002424	0.0255	0.00904
30	0.3372	0.0207	0.3626	0.0714	0.3587	0.00882	0.1206	0.004632	0.1041	0.0161	0.0259	0.0106
35	0.3512	0.0517	0.3128	0.0168	0.3553	0.0422	0.1229	0.003968	0.1143	0.0104	0.0234	0.001764
40	0.3353	0.0534	0.2717	0.0331	0.3668	0.0491	0.1384	0.0002205	0.141	0.006616	0.0255	0.0121
45	0.3796	0.0657	0.2745	0.0632	0.3958	0.003088	0.1349	0.0284	0.1307	0.0212	0.0273	0.00948
50	0.3516	0.003088	0.336	0.0548	0.4089	0.0478	0.1245	0.0137	0.1476	0.0194	0.0261	0.005952

## Sheet: Ethanol
Ethanol(mmol)	G.m+Fe3O4 (5mmol L-1)		G.m+M.b+Fe3O4(2.5mmol L-1)+Fe3O4 (2.5mmol L-1, after 10 days)		G.m+M.b+Fe3O4 (5mmol L-1)		Fe3O4 (5mmol L-1) without cells		M.b+Fe3O4 (5mmol L-1)		G.m+M.b
Days	mean	SD			mean	SD			mean	SD	mean	SD
0	1.2324	0.0616	1.13	0.1312	1.15	0.12	1.0454	0.1253	1.0586	0.0529	1.1818	0.0392
5	1.0865	0.0543	0.899	0.0124	0.7918	0.0396	0.9246	0.0803	1.1819	0.0591	1.1541	0.0528
10	0.9803	0.049	0.725	0.0131	0.4781	0.0239	0.9873	0.1319	1.0906	0.0545	1.1511	0.0566
15	0.9447	0.0472	0.635	0.0689	0.5002	0.025	0.9248	0.039	1.0608	0.0603	1.1365	0.0473
20	0.8977	0.0449	0.555	0.0122	0.4622	0.0231	0.978	0.1434	1.0439	0.0522	1.1223	0.0462
25	0.6022	0.0301	0.562	0.01	0.4309	0.0215	0.9193	0.004224	1.1608	0.058	1.1206	0.0111
30	0.5867	0.0293	0.44	0.0139	0.4187	0.0209	0.9277	0.0409	1.1393	0.062	1.0898	0.0542
35	0.5449	0.0272	0.32	0.0108	0.3389	0.0169	0.849	0.1415	1.1021	0.0651	1.0577	0.0543
40	0.4548	0.0227	0.252	0.0131	0.2742	0.0137	0.8683	0.1152	1.1481	0.0574	1.0323	0.0511
45	0.4124	0.0206	0	0	0	0	0.9575	0.0413	1.0101	0.0455	0.9356	0.1418
50	0.3657	0.0183	0	0	0	0	1.012	0.0989	1.0953	0.0548	0.9347	0.1467

## Sheet: Acetate
Acetate(mmol)	G.m+Fe3O4 (5mmol L-1)		G.m+M.b+Fe3O4(2.5mmol L-1)+Fe3O4 (2.5mmol L-1, after 10 days)		G.m+M.b+Fe3O4 (5mmol L-1)		Fe3O4 (5mmol L-1) without cells		M.b+Fe3O4 (5mmol L-1)		G.m+M.b
Days	mean	SD			mean	SD			mean	SD	mean	SD
0	0	0	0	0	0	0	0	0	0	0	0	0
5	0	0	0	0	0	0	0	0	0	0	0	0
10	0	0	0	0	0	0	0	0	0	0	0.0507	0.002532
15	0.2183	0.0174	0.1946	0.0116	0.2063	0.0171	0	0	0	0	0.1182	0.0112
20	0.2306	0.0606	0.2039	0.0238	0.2147	0.0107	0	0	0	0	0.1299	0.0111
25	0.2609	0.005192	0.1389	0.006944	0.1001	0.0222	0	0	0	0	0	0
30	0	0	0	0	0	0	0	0	0	0	0	0
35	0	0	0	0	0	0	0	0	0	0	0	0
40	0	0	0	0	0	0	0	0	0	0	0	0
45	0	0	0	0	0	0	0	0	0	0	0	0
50	0	0	0	0	0	0	0	0	0	0	0	0
