# Supplementary material for: Necessity of electrically conductive pili for methanogenesis with magnetite stimulation
Source: PeerJ. 2018 Mar 21;6:e4541. doi: 10.7717/peerj.4541 (PMC5866715; doi:10.7717/peerj.4541)
Supplement: Data S2 [file peerj-06-4541-s002.xlsx]

## Sheet: Sheet1
Quantities of ferrous iron in cultures of Geobacter metallireducens (G.m) and Geobacter sulfurreducens (G.s) in the presence of magnetite with ethanol and acetate as the substrates.
Ferrous iron(mmol)	G.m+Fe3O4+Ethanol		G.m+Fe3O4+Acetate		G.s+Fe3O4+Acetate		+Fe3O4
	mean	SD	mean	SD	mean	SD	mean	SD
0	0	0	0	0	0	0	0	0
2	0.029	0.0015986	0.003742	0.002646	0.0026506	0.0028665	0.0035861	0.0024255
4	0.037	0.0203	0.003898	0.0028665	0.0026506	0.0028665	0.0032743	0.0024255
6	0.0627	0.0051267	0.0441	0.0011025	0.0015592	0.00088201	0.00088873	0.0033075
8	0.0786	0.0165	0.0426	0.0019845	0.0070163	0.0002205	0.00093551	0.005292
11	0.0939	0.0060087	0.1062	0.0135	0.02	0.0132	0.0017151	0.0050715
